# Supplementary material for: Atmosphere-Induced Transient Structural Transformations of Pd–Cu and Pt–Cu Alloy Nanocrystals
Source: PubMed Central journal article supplement (PMC8619592; doi:10.1021/acs.chemmater.1c02377), 2021-11-10
Supplement: cm1c02377_si_001.pdf [file cm1c02377_si_001.pdf]

## Supporting Information

### Atmosphere-Induced Transient Structural Transformations of Pd-Cu and Pt-Cu Alloy Nanocrystals

Lea Pasquale,<sup>†,‡,\*</sup> Sharif Najafshirtari,<sup>†,\*,#</sup> Rosaria Brescia,<sup>§</sup> Alice Scarpellini,<sup>§</sup> Cansunur Demirci,<sup>†,‡</sup> Massimo Colombo,<sup>†</sup> and Liberato Manna<sup>†</sup>

<sup>†</sup> Department of Nanochemistry, Istituto Italiano di Tecnologia, Via Morego 30, 16163 Genova, Italy

<sup>‡</sup> Dipartimento di Chimica e Chimica Industriale, Università degli Studi di Genova, Via Dodecaneso 31, 16146 Genova, Italy

<sup>§</sup> Electron Microscopy Facility, Istituto Italiano di Tecnologia, Via Morego 30, 16163 Genova, Italy

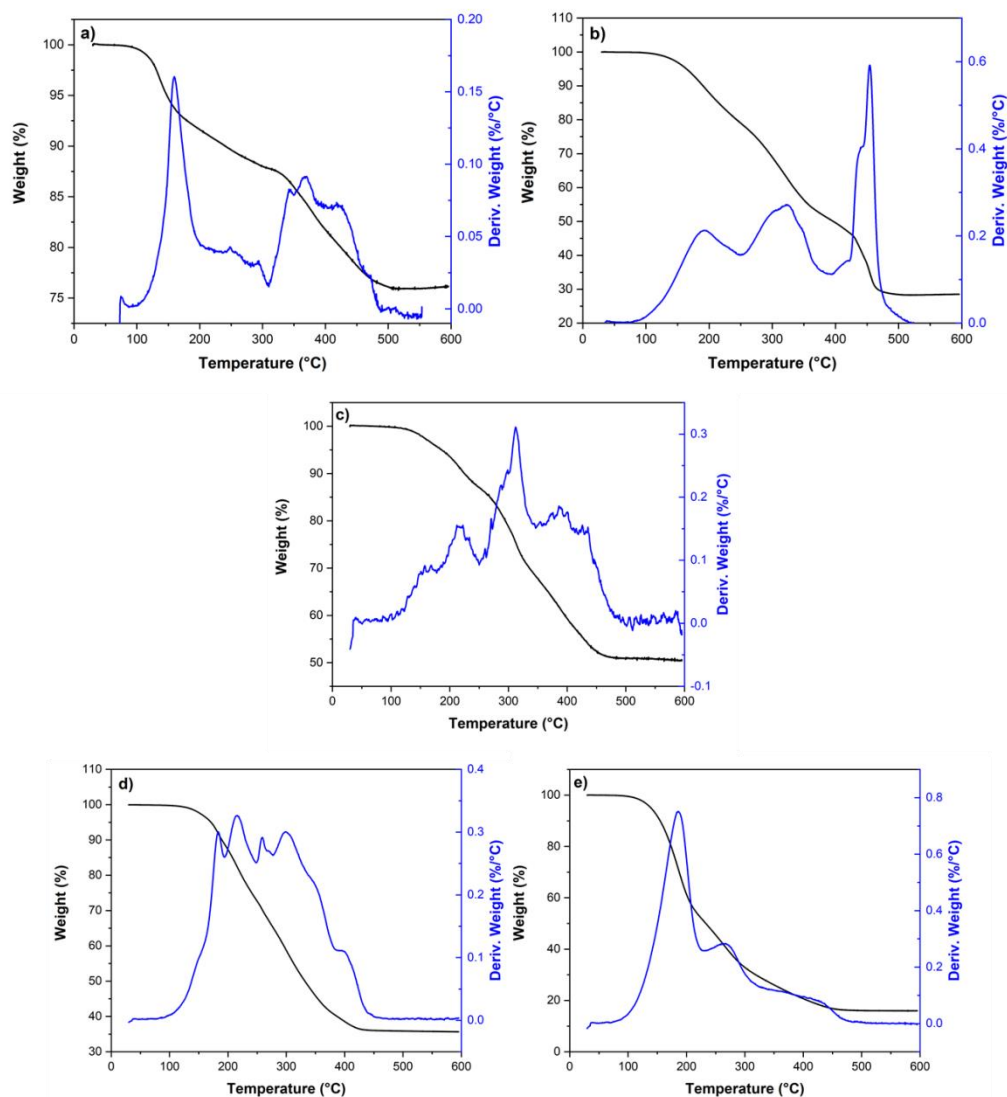

**Figure S1.** TGA of (a) Pd-Cu, (b) Pt-Cu (c) Cu, (d) Pd and (e) Pt NC colloidal solution under air flow. Weight is reported as a function of time.

The TGA was performed on a Q500 instrument from TA Instruments. After solvent evaporation, the sample (~3 mg of NCs) was equilibrated at 30 °C for 30 min, then heated to 600 °C with a 10 °C min<sup>-1</sup> heating rate under 50 mL min<sup>-1</sup> of air flow. On the basis of the weight loss as a function of time, it can be seen that the thermal annealing at 450 °C in air was efficient for removing the organic surfactants from the bi- and monometallic NC surface.

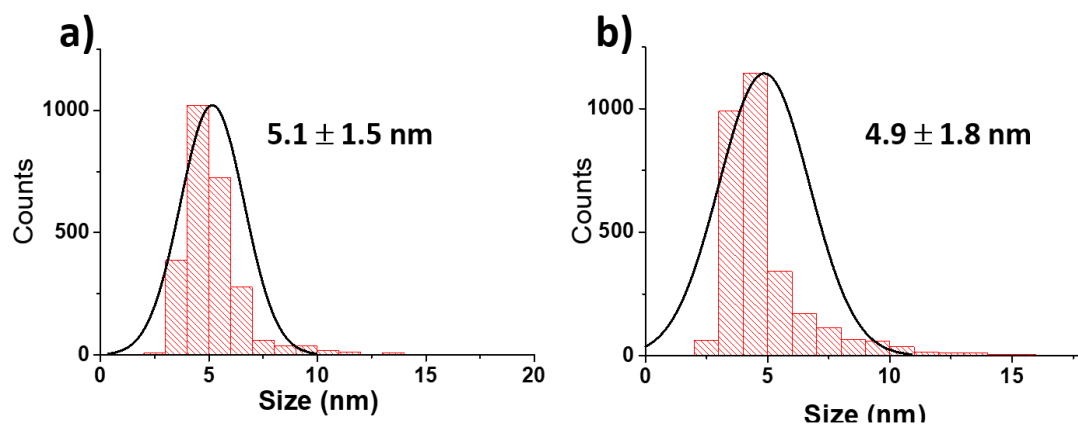

**Figure S2.** Size distribution histograms for (a) Pd-Cu NCs obtained by measuring 755 NCs and for (b) Pt-Cu NCs by measuring 1445 NCs.

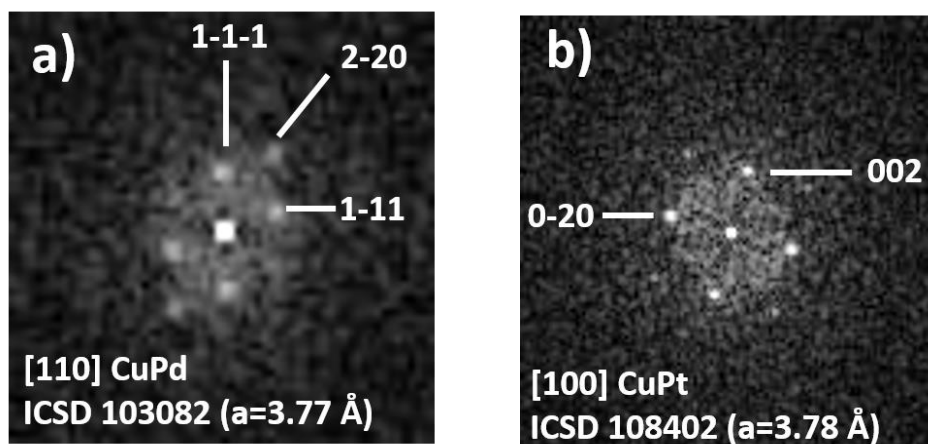

**Figure S3.** FFTs corresponding to (a) Figure 1c, matching with the [110] zone-axis projection of fcc CuPd (ICSD 103082) and (b) Figure 1g, matching with the [100] zone-axis projection of fcc CuPt (ICSD 108402).

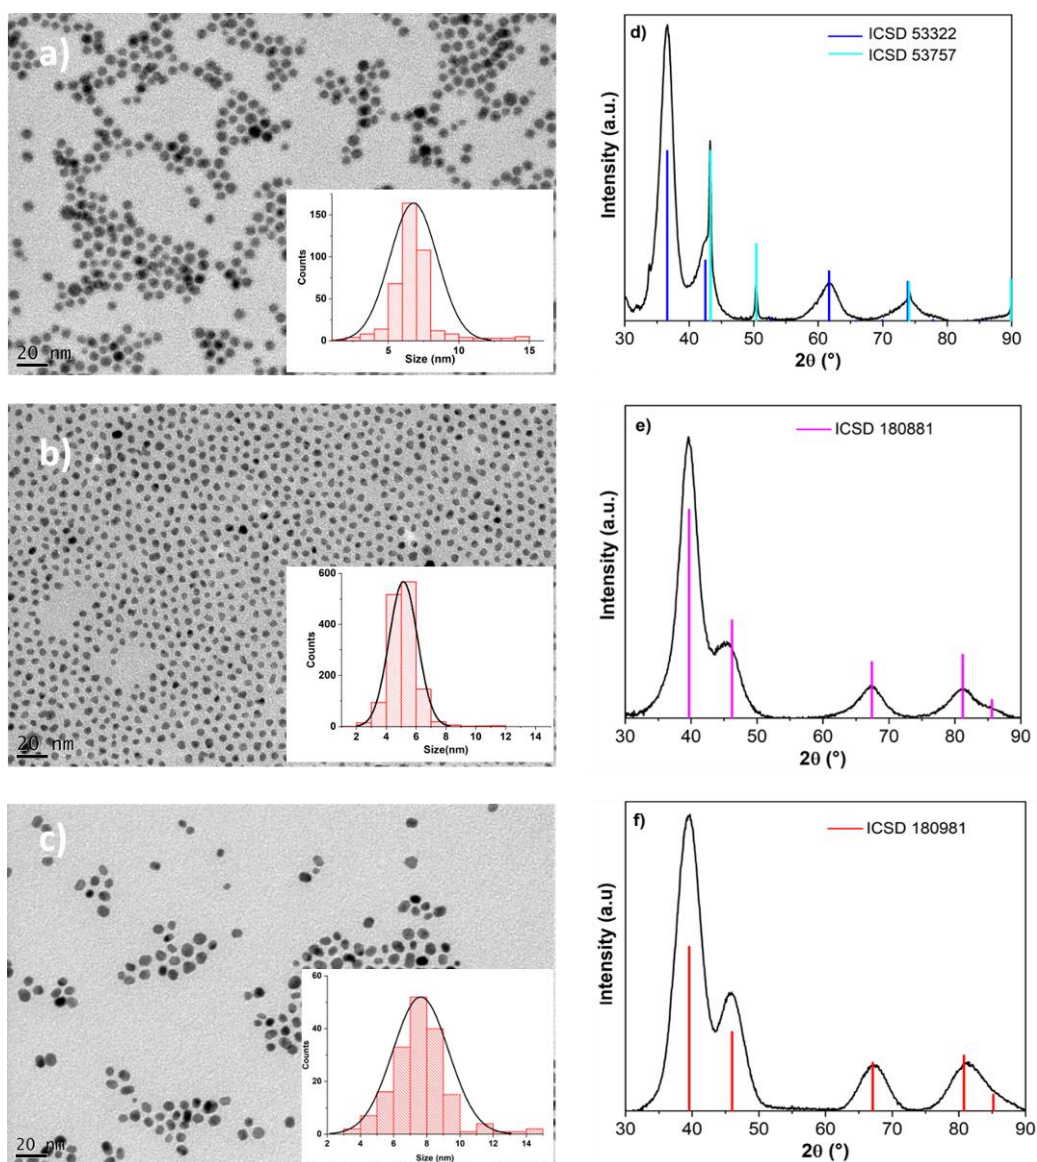

**Figure S4.** BF-TEM images of the as-synthesized (a) Cu, (b) Pd, (c) Pt NCs, with the corresponding size distribution histograms displayed as insets, and (d, e, f) XRD patterns with the expected peak position reference for fcc Cu (cyan, ICSD 53757) and fcc  $\text{Cu}_2\text{O}$  (blue, ICSD 53322), fcc Pd (magenta, ICSD 180881) and fcc Pt (red, ICSD 180981).

The NC size and shape of monometallic Cu, Pd and Pt NCs were analyzed by *BF-TEM* (Figure S2 a-c). The average size of Cu, Pd and Pt NCs were  $6.8 \pm 1.7$  nm based on 405 particles,  $5.2 \pm 1.0$  nm on 1375 particles, and  $7.6 \pm 1.7$  nm on 174 particles, respectively. The XRD patterns collected from the NCs were in agreement with fcc- $\text{Cu}_2\text{O}$ , fcc-Pd and fcc-Pt structures (Figure S2 d-f). As reported by Yin et al.,<sup>1</sup> the presence of sharper peaks indexed to the fcc of metal Cu in the pattern of Cu NCs can be related to NC size larger than 5 nm.<sup>1</sup> However, it cannot be explicitly concluded that the particle size is 5 nm as the XRD gives information about the crystallite or domain size rather than particle size.

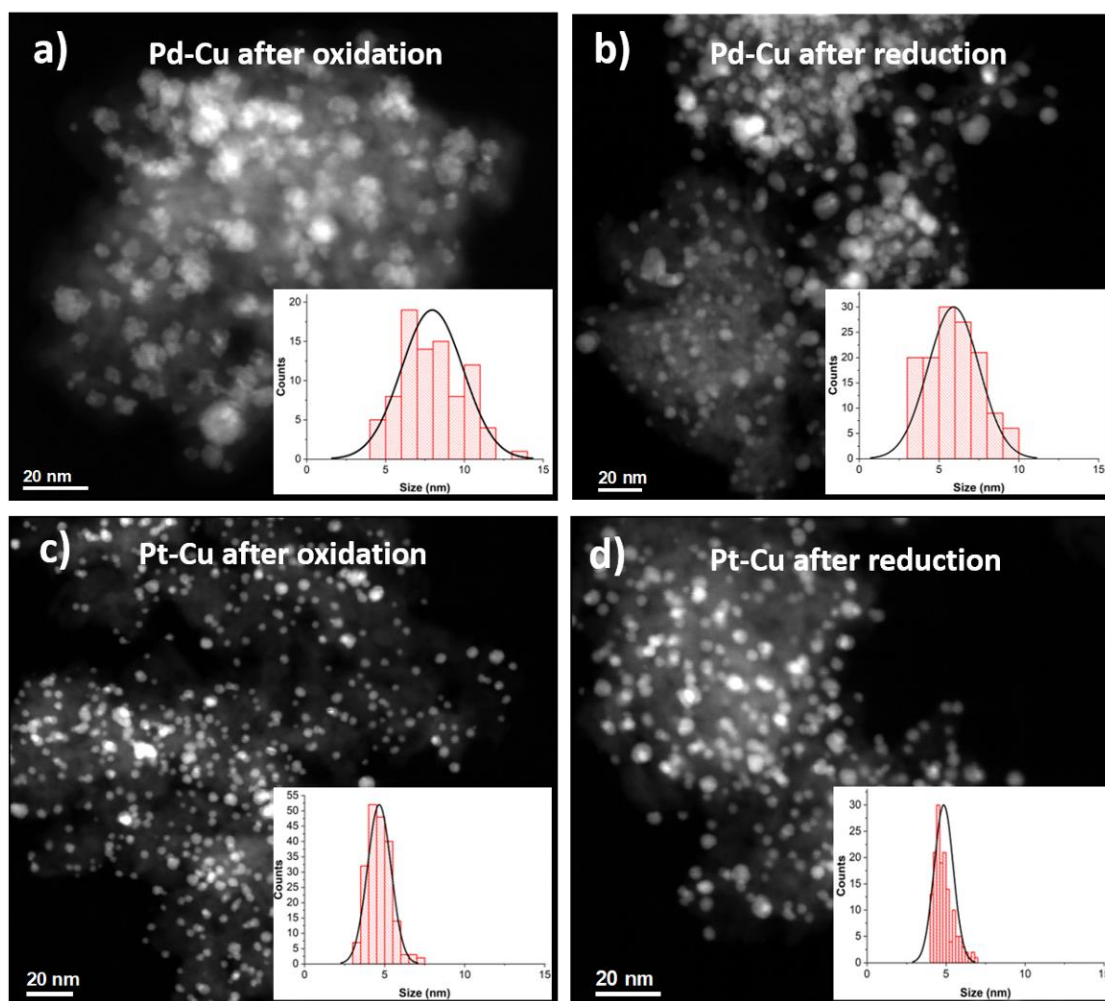

**Figure S5.** HAADF-STEM images of alumina supported (a, b) Pd-Cu and (c, d) Pt-Cu NCs after oxidizing (a, c) and reducing (b, d) treatments with the corresponding size distribution histograms displayed as insets.

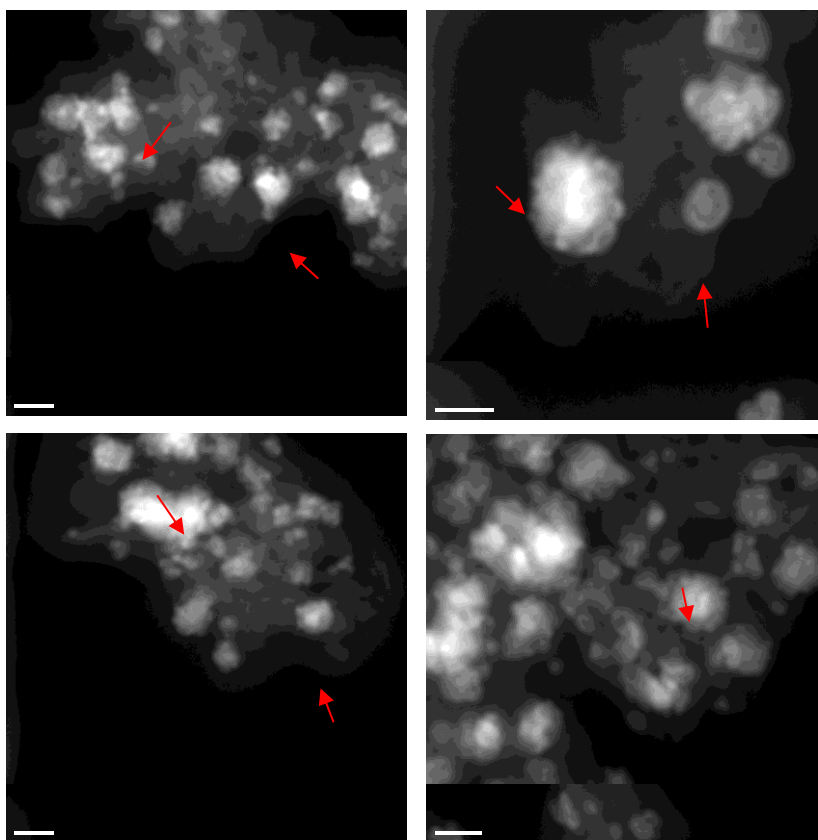

**Figure S6.** HAADF-STEM images of alumina supported Pd-Cu NCs after oxidizing treatment.



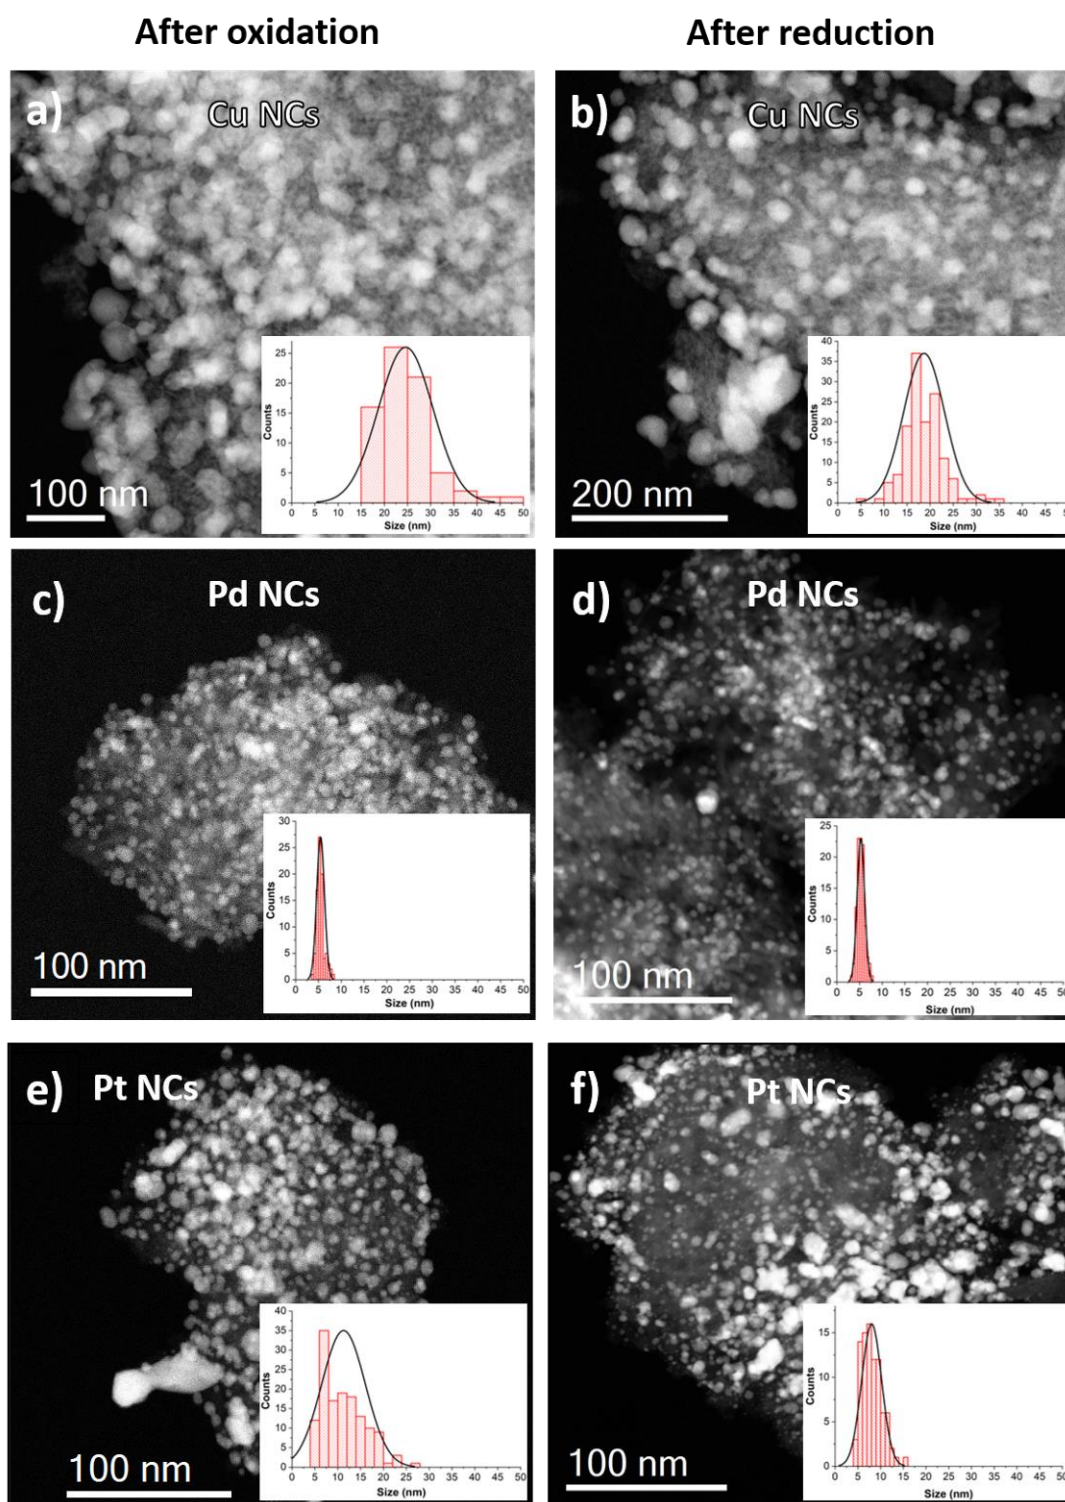

**Figure S7.** HAADF-STEM images of alumina supported (a, b) Cu, (c, d) Pd and (e, f) Pt NCs after oxidizing (a, c, e) and reducing (b, d, f) treatments with the corresponding size distribution histograms displayed as insets.

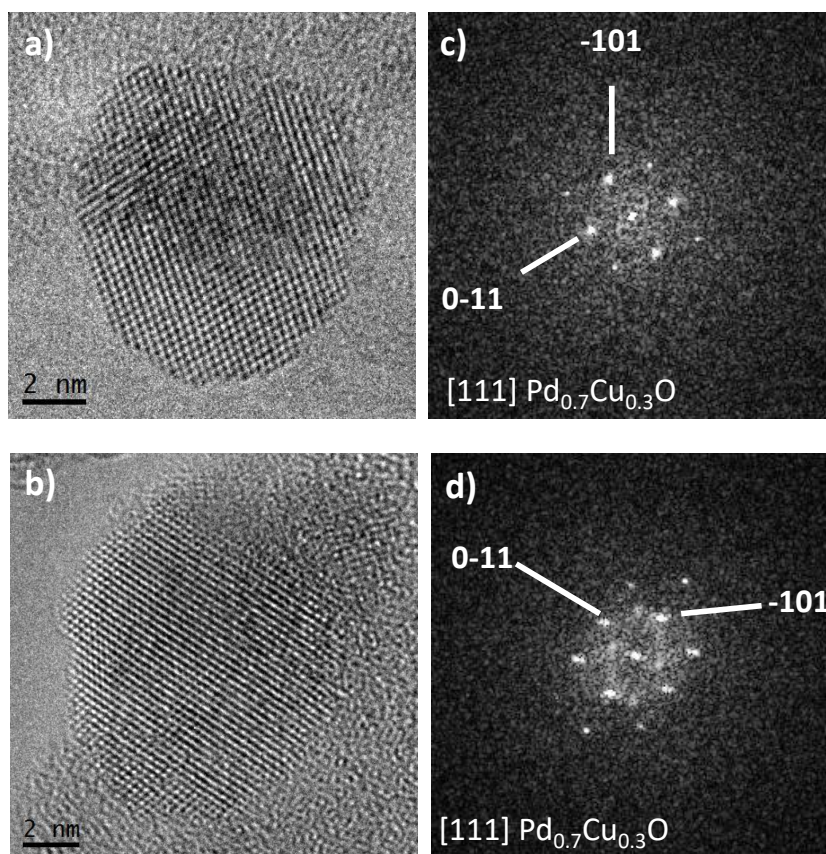

**Figure S8.** (a, b) HRTEM images of single-crystal Pd-Cu nanoparticles of alumina supported Pd-Cu NCs after oxidation with the corresponding (c, d) FFT patterns, matching with Pd<sub>0.7</sub>Cu<sub>0.3</sub>O.



## Calculation of Pd<sub>0.7</sub>Cu<sub>0.3</sub>O NC size based on starting Pd-Cu NC size

To estimate the enlargement of Pd<sub>0.5</sub>-Cu<sub>0.5</sub> NC size ascribed to the formation of Pd<sub>0.7</sub>Cu<sub>0.3</sub>O NCs, the following calculations are taken into account. First, considering the number of Pd atoms in the unit cell equal to 4, as well as the known unit cell volume of Pd-Cu (53.41 Å<sup>3</sup> in the Pd<sub>1</sub>Cu<sub>1</sub> card ICSD 103082), the number of Pd atoms in the NC was calculated from the following expression:

$$N_{Pd \text{ atoms in PdCu NC}} = \frac{N_{Pd \text{ atoms per unit cell}}}{V_{PdCu \text{ unit cell}}} V_{PdCu \text{ NC}}$$

(Eq. S1)

where  $V_{PdCu \text{ NC}}$  is the volume calculated by the average of the NC size. The number of Cu atoms in the NC is equal to that of Pd being the atomic Pd:Cu ratio = 50:50. The expected volume  $V_{Pd0.7Cu0.3O \text{ NC}}$  of oxidized NC was calculated considering the unit cell volume equal to 47.77 Å<sup>3</sup> and the number of Cu atoms per unit cell of Pd<sub>0.7</sub>Cu<sub>0.3</sub>O equal to 0.6 as follows, assuming that the NC has a spherical shape:

$$V_{Pd0.7Cu0.3O \text{ NC,Cu}} = \frac{N_{Cu \text{ atoms in Pd0.7Cu0.3O NC}}}{N_{Cu \text{ atoms per Pd0.7Cu0.3O unit cell}}} V_{Pd0.7Cu0.3O \text{ unit cell}}$$

(Eq. S2)

The unit cell volume of Cu<sub>0.3</sub>Pd<sub>0.7</sub>O was calculated by modifying the tetragonal cell of PdO (ICSD 24692). The new cell has Cu and Pd ions with fractional occupancies (0.3 and 0.7, respectively) in the sites of Pd ions and parameters, a = b = 3.005 Å and c = 5.29 Å, calculated according to the plots in ref. 2 for Cu<sub>x</sub>Pd<sub>1-x</sub>O, with x = 0.3.

The size of NC is then given by:

$$d_{Pd0.7Cu0.3O \text{ NC,Cu}} = 2r_{Pd0.7Cu0.3O \text{ NC,Cu}} = 2 \sqrt[3]{\frac{3V_{Pd0.7Cu0.3O,Cu}}{4\pi}}$$

(Eq. S3)

where d and r are the diameter and radius of NC, respectively.

From the experimental data, the average size of the starting Pd<sub>0.5</sub>-Cu<sub>0.5</sub> NC is 4.9 ± 1.8 nm while that calculated for oxidized NC with the Equations (S3) is 7.0 nm, value in agreement with that observed in the HAADF-STEM images (7.8 ± 2.0 nm). This means that the growth of NC size is 43% referred to the starting diameter.

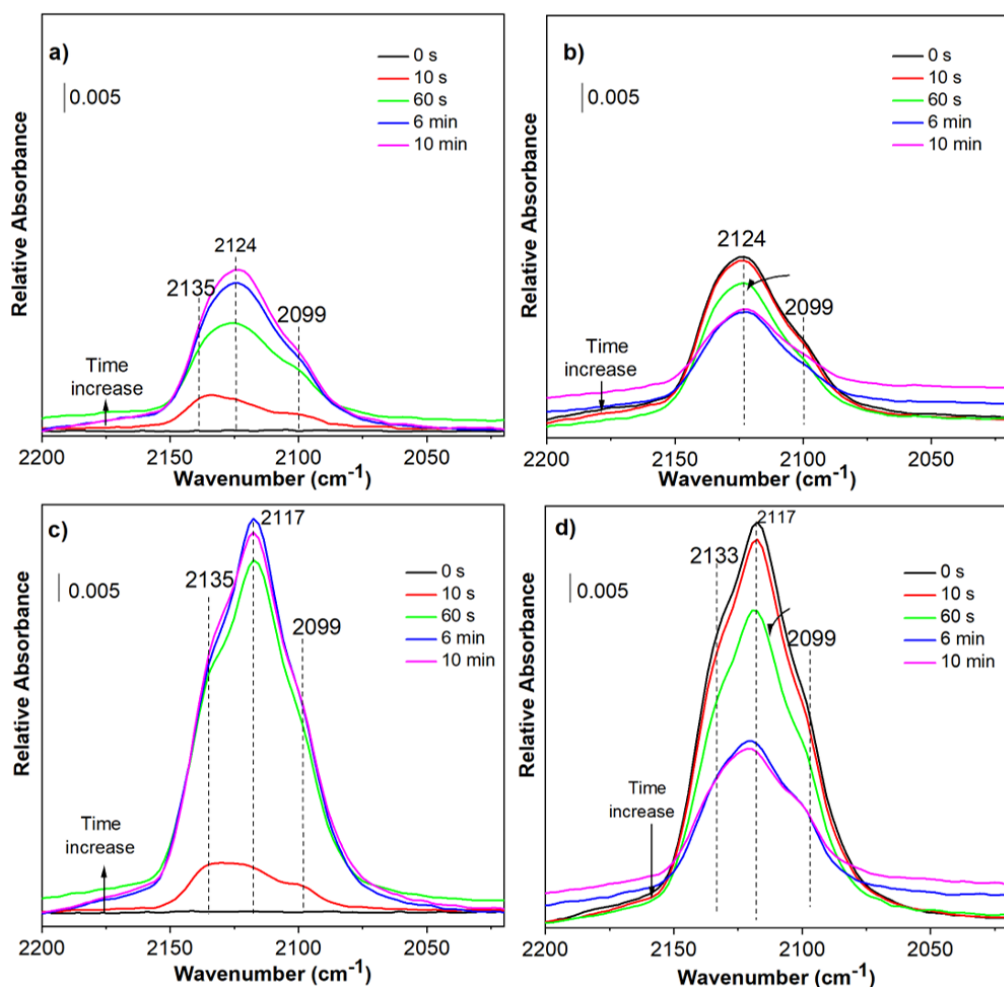

**Figure S9.** DRIFT spectra in the carbonyl region recorded during the adsorption (a, c) and desorption (b, d) of CO at room temperature on alumina supported Cu NCs after the (a, b) oxidizing and (c, d) reduction treatments.

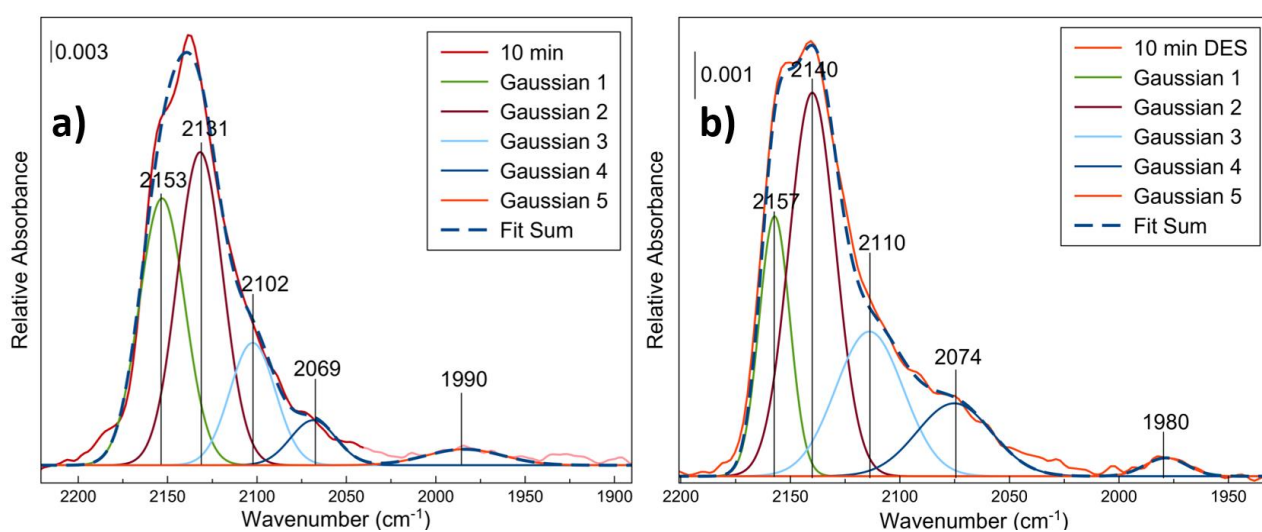

**Figure S10.** Deconvolution of DRIFT spectra recorded at 10-min of CO (a) adsorption and (b) desorption on Pd-Cu alloy NCs supported on  $\text{Al}_2\text{O}_3$  after oxidation.

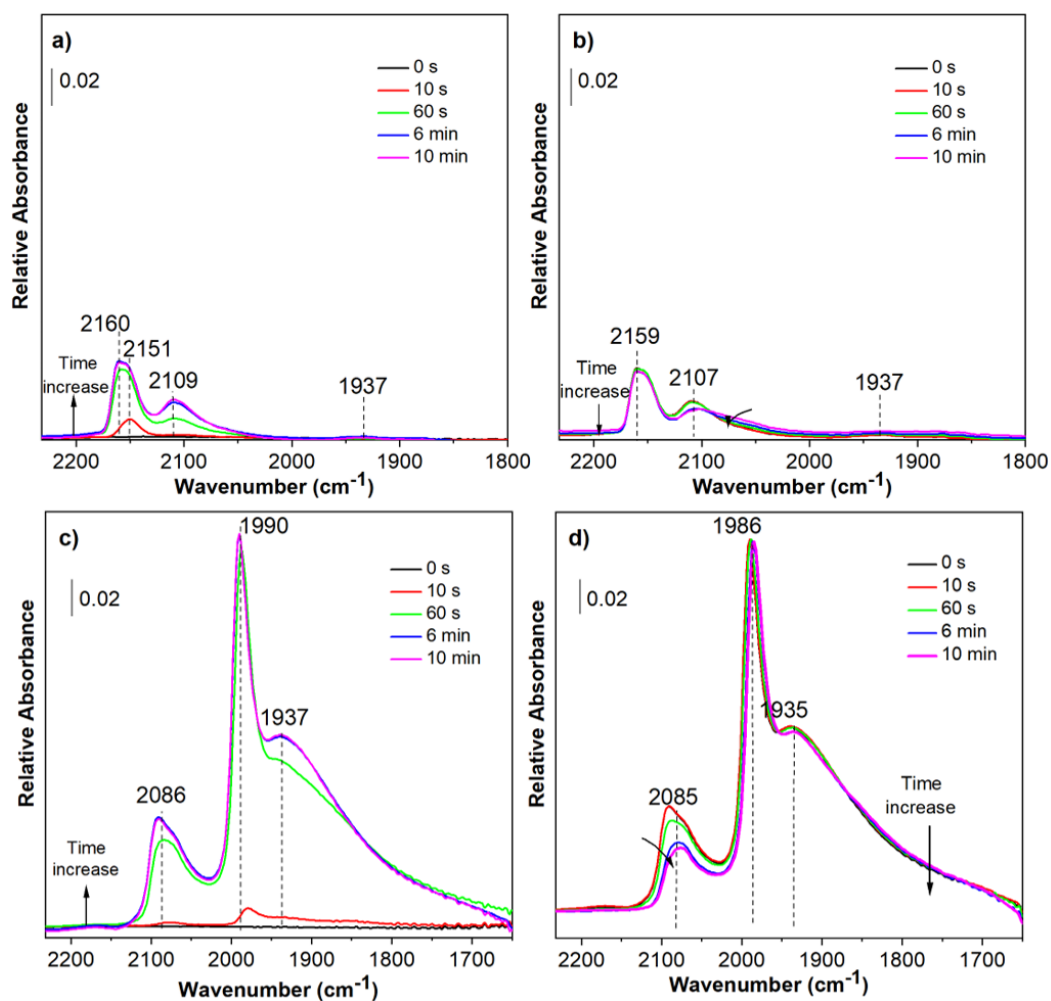

**Figure S11.** DRIFT spectra in the carbonyl region recorded during adsorption (a, c) and desorption (b, d) of CO at room temperature on alumina supported Pd NCs after (a, b) oxidizing and (c, d) reduction treatments.

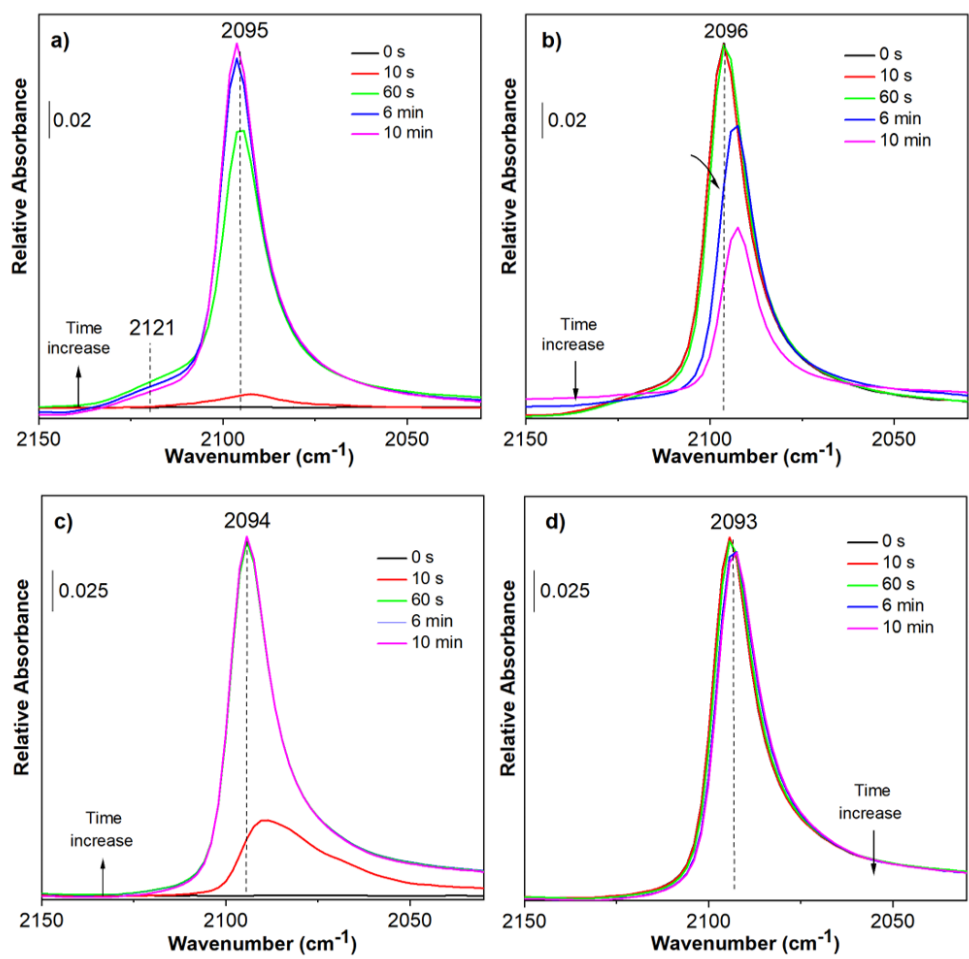

**Figure S12.** DRIFT spectra in the carbonyl region recorded during adsorption (a, c) and desorption (b, d) of CO at room temperature on alumina supported Pt NCs after (a, b) oxidizing and (c, d) reduction treatments.

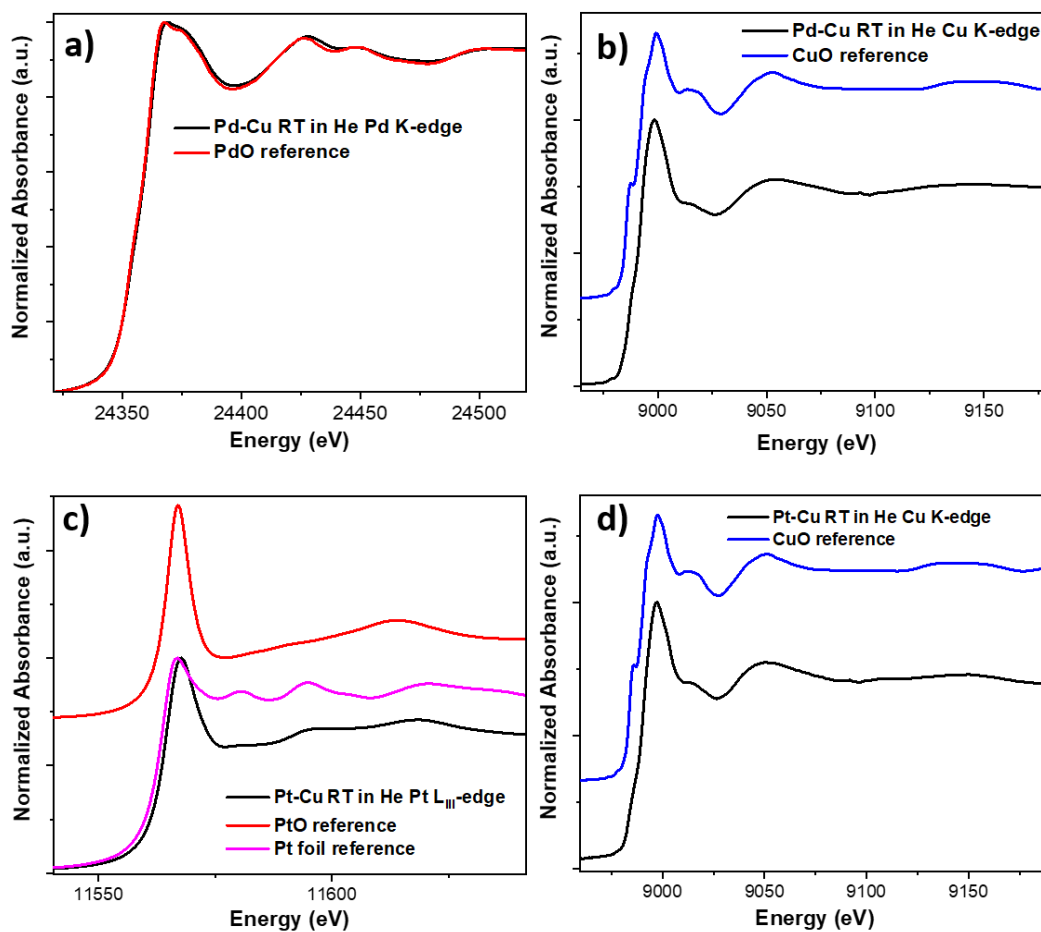

**Figure S13.** XANES spectra of alumina supported Pd-Cu (a, b) and Pt-Cu (c, d) NCs collected at RT in He at (a) Pd K-edge and (b) Cu K-edge along with the XANES spectra of PdO and CuO (collected at the SuperXAS beamline of the SLS) references and at (c) Pt L<sub>III</sub>-edge and (d) Cu K-edge along with the XANES spectra of Pt foil reference, and PtO and CuO reference spectra collected at SuperXAS beamline of the SLS.



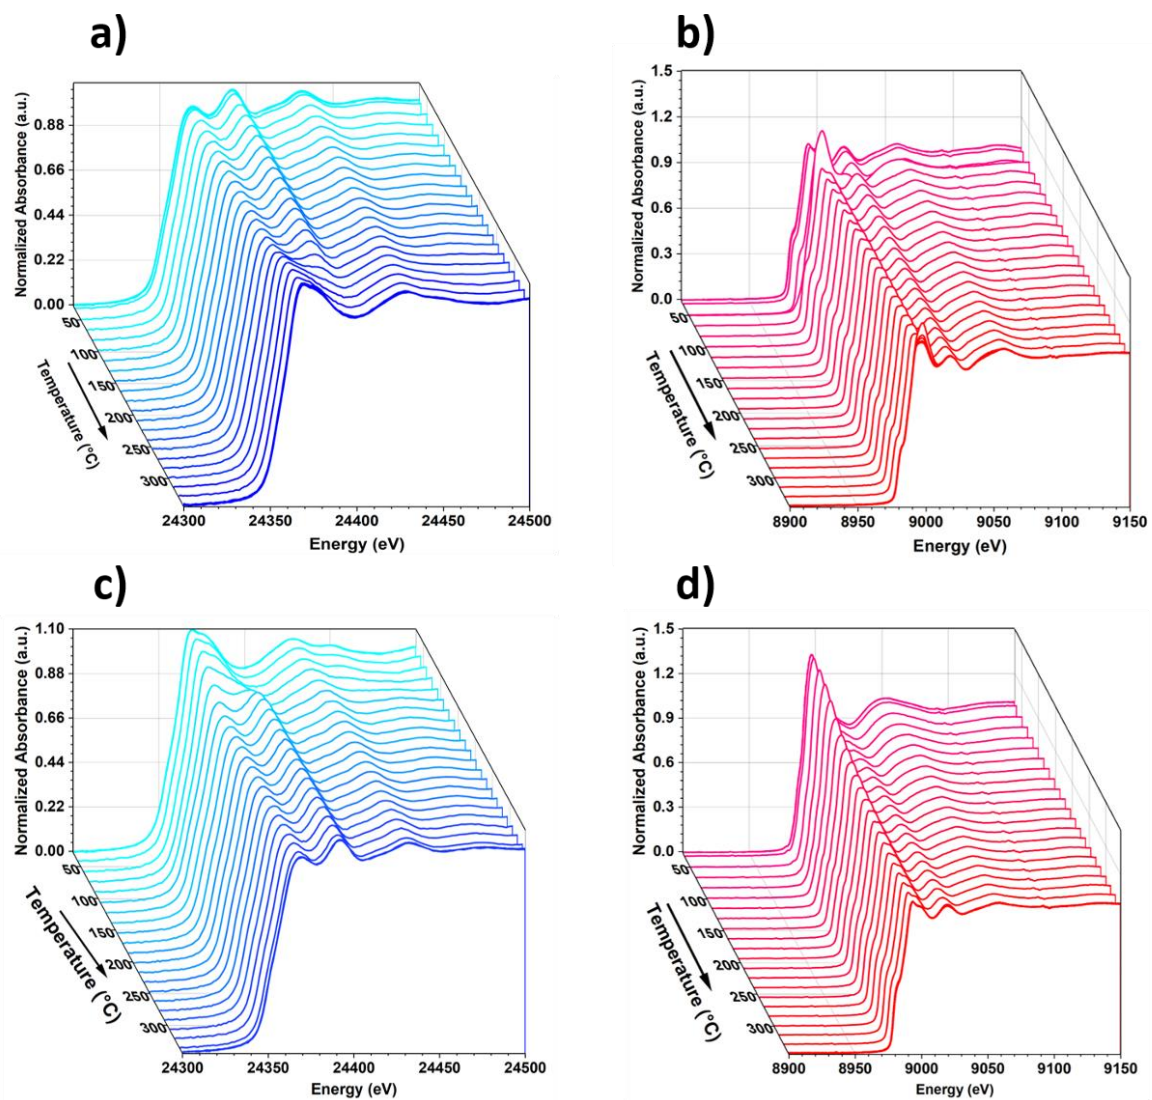

**Figure S14.** In situ XANES evolution of the alumina supported Pd-Cu NCs (a, c) at the Pd K-edge and (b, d) at the Cu K-edge during (a, b) the oxidizing and (c, d) the reduction treatments.

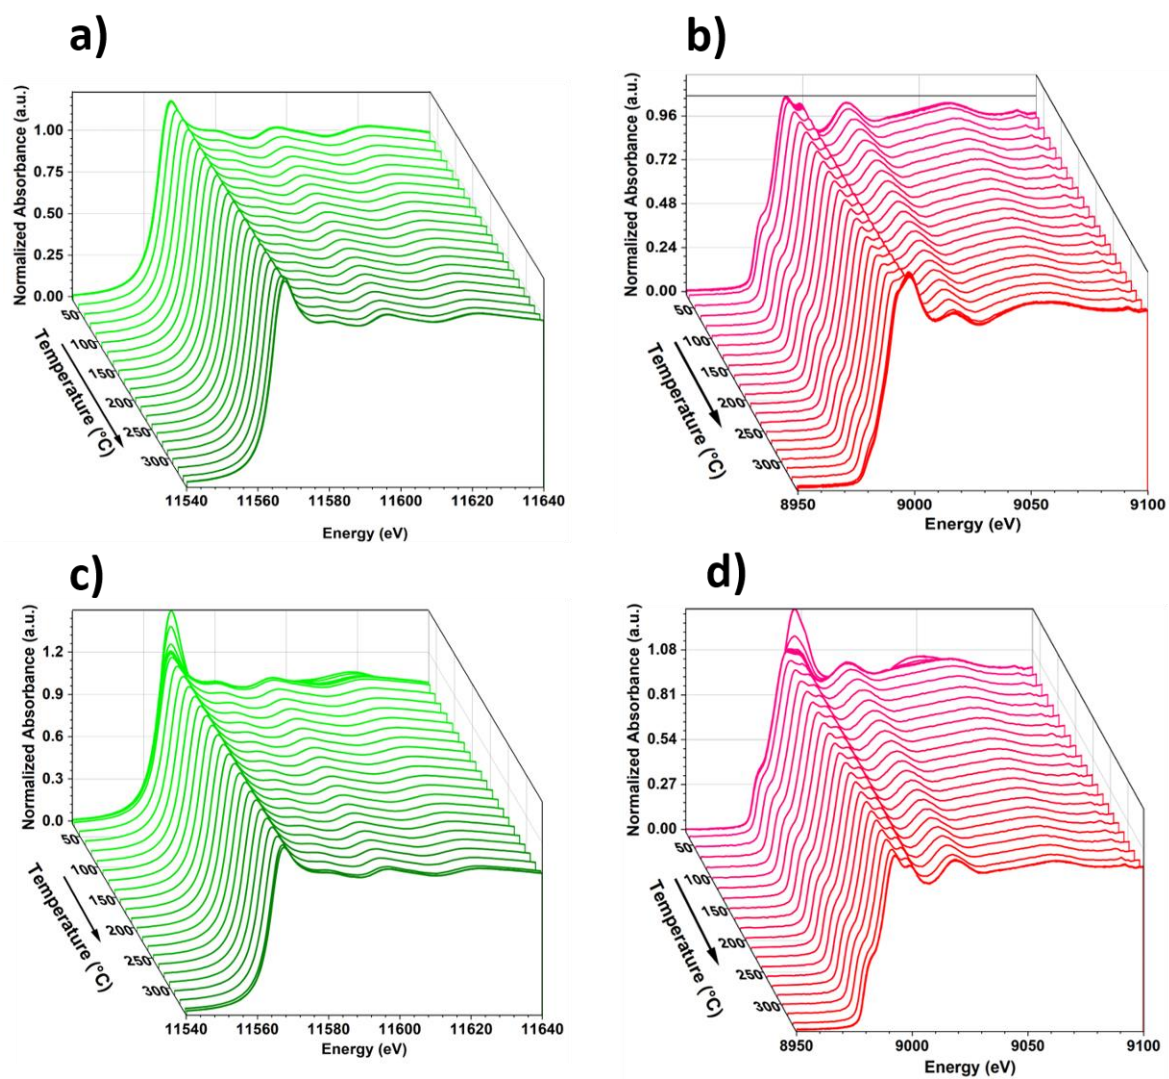

**Figure S15.** In situ XANES evolution of the alumina supported Pt-Cu NCs (a, c) at the Pt L<sub>III</sub>-edge and (b, d) at the Cu K-edge during (a, b) the oxidizing and (c, d) the reduction treatments.

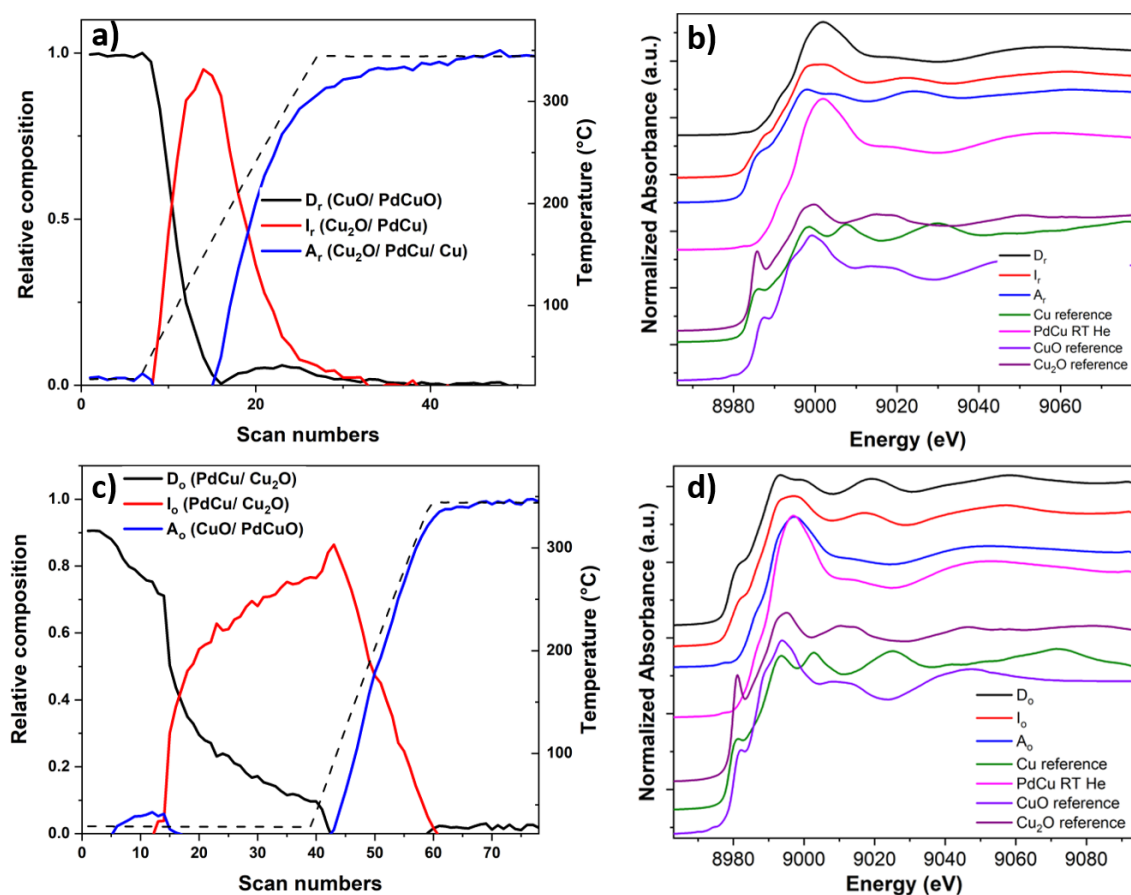

**Figure S16.** Concentration profiles of components as a function of the temperature during reduction (a) and during oxidation (c) at the Cu K-edge. XANES spectra of the species formed during reduction (b) and during oxidation (d) for the alumina supported Pd-Cu NCs along with the XANES spectra of Cu foil reference, CuO and Cu<sub>2</sub>O reference spectra collected at the SuperXAS beamline of the SLS, and Pd-Cu NCs spectrum collected at room temperature in He.

During reduction at the Cu K-edge of the Pd-Cu NCs, the concentration profile as a function of temperature evidenced a two-step reduction process (Figure S16a) in which the component D<sub>r</sub> started to be significantly reduced into the intermediate component I<sub>r</sub> at T~50 °C and then the formation of the component A<sub>r</sub> started to be significant at T>150 °C. The comparison between the pure component spectra with the reference ones (Figure S16b) suggested that the D<sub>r</sub> consists of a fingerprint of CuO, the I<sub>r</sub> of Cu<sub>2</sub>O one and A<sub>r</sub> to the metallic Cu structure. The best fit of the FT of the EXAFS spectra (Table S2) for the component D<sub>r</sub> presented contributions of Cu-O and Cu-Cu coordination shells at 2.00 Å and at 2.97 Å, characteristic of CuO, and a lesser extent of PdCuO mixed oxide. The best fit of I<sub>r</sub> component was based on the contribution of two species. Specifically, Cu-O and Cu-Cu shells at 1.94 Å and 3.00 Å related to Cu<sub>2</sub>O and Cu-Cu one at 2.65 Å referred to Pd-Cu were found. Finally, the A<sub>r</sub> component was mainly characterized by a single Cu-Cu coordination shell at 2.48 Å related to metallic Cu with a minor contribution of Cu-Cu shell at 2.58 Å of Pd-Cu species and Cu-O shell at 1.86 Å for Cu<sub>2</sub>O.

When the reduced NCs were subjected to an oxidative environment at the Cu K-edge, three components named D<sub>o</sub> (descending), I<sub>o</sub> (intermediate) and A<sub>o</sub> (ascending) were identified and presented as a function of the temperature in Figure S16c, d along with the corresponding spectra. Initially, already a room temperature under the

exposure to the oxygen, the decrease of the constituent  $D_0$  proceed parallel with the appearance of constituent  $I_0$ ; as soon as the temperature started to increase in the heating ramp, the component  $A_0$  progressively increased until reaching the complete oxidation at 350 °C. The comparison between the XANES spectra with the reference ones (Figure S16d) revealed the formation of the intermediate  $Cu_2O$  as component  $I_0$ . This was confirmed from its absorption edge lying in between those of the constituents  $D_0$  and  $A_0$ , related to the  $Cu^{+2}$  and  $CuO$  species, respectively. The EXAFS signal and FT of the components  $D_0$  and  $I_0$  required two contributions for a better fit (Table S2), one from Cu and Pd atoms in an ordered CuPd alloy and one from O atoms in  $Cu_2O$ . In particular, the contribution of the first one decreased from  $D_0$  to  $I_0$  with the increase of the second one (coordination number (CN) of Cu-O equal to 0.49 for  $D_0$  to 1.97 for  $I_0$ ). Finally, the best fit for  $A_0$  confirmed the formation of  $CuO$  with a minor extent of  $PdCuO$ .

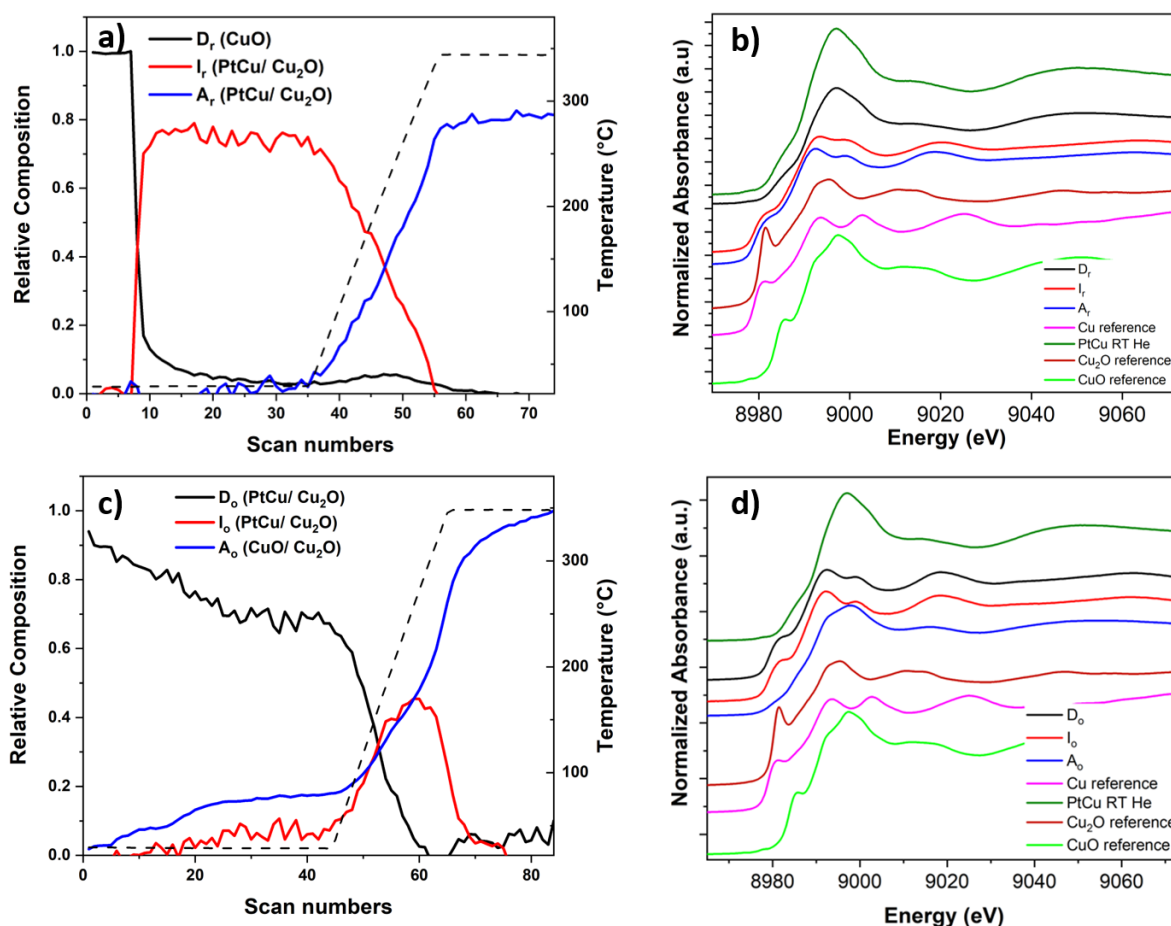

**Figure S17.** Concentration profiles of components as a function of the temperature during reduction (a) and during oxidation (c) at the Cu K-edge. XANES spectra of the species formed during reduction (b) and during oxidation (d) for the alumina supported Pt-Cu NCs along with the XANES spectra of Cu foil reference, CuO and Cu<sub>2</sub>O reference spectra collected at SuperXAS beamline of the SLS, and Pt-Cu NCs spectrum collected at room temperature in He.

During reduction at the Cu K-edge of the Pt-Cu NCs, the spectrum of the descending  $D_r$  component (Figure S17b) was similar to that of CuO, while the second (intermediate component  $I_r$ ) and the third (ascending component  $A_r$ ) ones showed characteristic features similar to those of Cu<sub>2</sub>O and metallic Cu,<sup>3,4</sup> respectively. The concentration dependence of these three components (Figure S17a) proved that first,  $D_r$  started to be reduced already at room temperature into  $I_r$ , and at the beginning of the heating ramp,  $A_r$  started to be significant. As suggested by the qualitative analysis of the XANES part, the structural parameter determined by the fitting of the FT (Table S4) confirmed the presence of CuO as starting species assigned to  $D_r$ . The intermediate  $I_r$  component showed a main peak in the R-space around 2.60 Å compatible with Cu-Cu first neighbors in the fcc Pt-Cu structure. A minor contribution at 1.90 Å was related to oxygen neighbors around Cu absorbing atoms for Cu<sub>2</sub>O. Finally, the  $A_r$  component was satisfactorily described by a Cu poor disordered alloy (CN Cu-Cu =  $3.28 \pm 0.6$ , CN Cu-Pt =  $5.34 \pm 0.7$ ) with a minor contribution at 1.93 Å related to Cu<sub>2</sub>O. The low coordination number of 0.33 found for this last species suggested the formation of small clusters. This result describing the final state at the end of the reduction was in line with those



obtained at the Pt L<sub>III</sub>-edge, corresponding with the formation of a Pt-rich Pt-Cu alloy, corroborated by the SAED analysis.

During oxidation at the Cu K-edge, three components involved during the oxidative treatment at Cu K-edge (descending D<sub>o</sub>, intermediate I<sub>o</sub> and ascending A<sub>o</sub> components) were found (Figure S17c). A decrease in the relative fraction of the component D<sub>o</sub> was paralleled by the transient growth in the contribution of the I<sub>o</sub> and a minor fraction to A<sub>o</sub>. Then, at the beginning of the heating ramp, I<sub>o</sub> was progressively increased along with A<sub>o</sub> until it disappeared as the temperature reached 350 °C (Figure S17c). The best fit of the FT EXAFS spectra for D<sub>o</sub> and I<sub>o</sub> (Table S4) showed scattering at 2.64 Å due to the Cu atoms in the first coordination shell and Pt atoms in the second one related to the formation of the fcc Pt-Cu alloy. These two components differed only in the Cu-Cu coordination number slightly higher for I<sub>o</sub>. A small contribution at around 1.90 Å was observed for the fitted Cu-O shell related to Cu<sub>2</sub>O. Finally, the complete oxidation of Cu was evident for the component A<sub>o</sub> from the presence of the Cu-O shell at 1.95 Å related to CuO with an increased intensity of the Cu-O interaction at 2.0 Å for Cu<sub>2</sub>O compared to what found for D<sub>o</sub> and I<sub>o</sub>.

**Table S1:** Structural parameters obtained from the fitting of EXAFS at the Pd K-edge for the alumina supported Pd-Cu NCs (k range for the Fourier transform 2.5-12.4 Å<sup>-1</sup>, the R-range for the fitting was 1-3.5/4 Å).

|                                 | <i>Scattering Path</i> | <i>CN</i> <sup>1</sup> | <i>R (Å)</i>  | <i>σ<sup>2</sup>(Å<sup>2</sup>)</i> | <i>R-factor</i> |  |
|---------------------------------|------------------------|------------------------|---------------|-------------------------------------|-----------------|--|
| <b>As-synthesized Pd-Cu NCs</b> | <u><i>PdCu</i></u>     |                        |               |                                     |                 |  |
|                                 | Pd-Pd <sub>1</sub>     | 5.30*                  | 2.703 ± 0.009 | 0.009 ± 0.001                       | 0.011           |  |
|                                 | Pd-Cu <sub>1</sub>     | 5.68*                  | 2.625 ± 0.017 | 0.014 ± 0.002                       |                 |  |
|                                 | Pd-Pd <sub>2</sub>     | 1.38*                  | 3.806 ± 0.009 | 0.009 ± 0.001                       |                 |  |
|                                 | Pd-Cu <sub>2</sub>     | 1.04*                  | 3.728 ± 0.017 | 0.014 ± 0.002                       |                 |  |
| <b>Red. D<sub>r</sub></b>       | <u><i>PdO</i></u>      |                        |               |                                     |                 |  |
|                                 | Pd-O <sub>1</sub>      | 2.80*                  | 2.026*        | 0.003 ± 0.001                       | 0.016           |  |
|                                 | Pd-Pd <sub>1</sub>     | 1.86*                  | 3.059 ± 0.006 | 0.006 ± 0.001                       |                 |  |
|                                 | <u><i>PdCuO</i></u>    |                        |               |                                     |                 |  |
|                                 | Pd-O <sub>1</sub>      | 0.68*                  | 2.026*        | 0.003 ± 0.001                       |                 |  |
|                                 | Pd-Cu <sub>1</sub>     | 1.69*                  | 3.004 ± 0.031 | 0.015*                              |                 |  |
|                                 | Pd-Pd <sub>1</sub>     | 1.34*                  | 3.059 ± 0.006 | 0.006 ± 0.001                       |                 |  |
| <b>Red. A<sub>r</sub></b>       | <u><i>PdCu</i></u>     |                        |               |                                     |                 |  |
|                                 | Pd-Pd <sub>1</sub>     | 7.30 ± 0.47            | 2.706 ± 0.006 | 0.011 ± 0.001                       | 0.013           |  |
|                                 | Pd-Cu <sub>1</sub>     | 2.66 ± 0.47            | 2.639 ± 0.014 | 0.014 ± 0.003                       |                 |  |
|                                 | Pd-Pd <sub>2</sub>     | 2.71 ± 0.63            | 3.809 ± 0.006 | 0.011 ± 0.001                       |                 |  |
|                                 | Pd-Cu <sub>2</sub>     | 1.04 ± 0.63            | 3.742 ± 0.014 | 0.014 ± 0.003                       |                 |  |
| <b>Oxi. D<sub>o</sub></b>       | <u><i>PdCu</i></u>     |                        |               |                                     |                 |  |
|                                 | Pd-Pd <sub>1</sub>     | 6.53 ± 0.56            | 2.717 ± 0.005 | 0.007 ± 0.001                       | 0.017           |  |
|                                 | Pd-Cu <sub>1</sub>     | 3.43 ± 0.56            | 2.667 ± 0.013 | 0.011 ± 0.003                       |                 |  |
|                                 | Pd-Pd <sub>2</sub>     | 1.94 ± 0.69            | 3.820 ± 0.005 | 0.007 ± 0.001                       |                 |  |
|                                 | Pd-Cu <sub>2</sub>     | 1.04*                  | 3.770 ± 0.013 | 0.011 ± 0.003                       |                 |  |
| <b>Oxi. A<sub>o</sub></b>       | <u><i>PdO</i></u>      |                        |               |                                     |                 |  |
|                                 | Pd-O <sub>1</sub>      | 2.80*                  | 2.026*        | 0.005 ± 0.001                       | 0.023           |  |
|                                 | Pd-Pd <sub>1</sub>     | 3.08*                  | 3.061 ± 0.017 | 0.012 ± 0.005                       |                 |  |
|                                 | <u><i>PdCuO</i></u>    |                        |               |                                     |                 |  |
|                                 | Pd-O <sub>1</sub>      | 0.44*                  | 2.026*        | 0.005 ± 0.001                       |                 |  |
|                                 | Pd-Cu <sub>1</sub>     | 0.67*                  | 2.954 ± 0.081 | 0.012*                              |                 |  |
| Pd-Pd <sub>1</sub>              | 0.15*                  | 3.057 ± 0.011          | 0.012 ± 0.005 |                                     |                 |  |
| <b>RT He</b>                    | <u><i>PdO</i></u>      |                        |               |                                     |                 |  |
|                                 | Pd-O <sub>1</sub>      | 2.80*                  | 2.026*        | 0.003 ± 0.001                       | 0.017           |  |
|                                 | Pd-Pd <sub>1</sub>     | 7.89*                  | 3.058*        | 0.007 ± 0.001                       |                 |  |
|                                 | <u><i>PdCuO</i></u>    |                        |               |                                     |                 |  |
|                                 | Pd-O <sub>1</sub>      | 0.77*                  | 2.027*        | 0.003 ± 0.001                       |                 |  |
|                                 | Pd-Cu <sub>1</sub>     | 1.56*                  | 3.027 ± 0.080 | 0.016*                              |                 |  |
|                                 | Pd-Pd <sub>1</sub>     | 4.25*                  | 3.059 ± 0.007 | 0.007 ± 0.001                       |                 |  |

<sup>1</sup> The calculation of CN at each shell was calculated as the product of NS<sub>o</sub><sup>2</sup>.

\*Parameters were fixed in the fitting and obtained as the product of N of the shell from the model and adjusted S<sub>o</sub><sup>2</sup> for the reference Pd.

Table S2: Structural parameters obtained from the fitting of EXAFS at the Cu K-edge for the alumina supported Pd-Cu NCs (k range for the Fourier transform 2.5-12.4 Å<sup>-1</sup>, the R-range for the fitting was 1-3/4 Å).

|                          | <i>Scattering Path</i>        | <i>CN</i>     | <i>R (Å)</i>  | <i>σ<sup>2</sup> (Å<sup>2</sup>)</i> | <i>R-factor</i> |                 |
|--------------------------|-------------------------------|---------------|---------------|--------------------------------------|-----------------|-----------------|
| As-synthesized Pd-Cu NCs | <u><i>PdCu</i></u>            |               |               |                                      |                 |                 |
|                          | Cu-Cu <sub>1</sub>            | 3.11*         | 2.663 ± 0.079 | 0.010*                               | 0.013           |                 |
|                          | Cu-Pd <sub>1</sub>            | 3.11*         | 2.654 ± 0.010 | 0.018 ± 0.002                        |                 |                 |
|                          | <u><i>Cu<sub>2</sub>O</i></u> |               |               |                                      |                 |                 |
|                          | Cu-O <sub>1</sub>             | 0.36          | 1.962 ± 0.006 | 0.010 ± 0.002                        |                 |                 |
| Cu-Cu <sub>1</sub>       | 1.08                          | 2.836 ± 0.079 | 0.018 ± 0.002 |                                      |                 |                 |
| Red. D <sub>r</sub>      | <i>Scattering Path</i>        | <i>CN</i>     | <i>R (Å)</i>  | <i>σ<sup>2</sup> (Å<sup>2</sup>)</i> | <i>R-factor</i> |                 |
|                          | <u><i>CuO</i></u>             |               |               |                                      |                 |                 |
|                          | Cu-O <sub>1</sub>             | 1.15 ± 0.1    | 2.005 ± 0.010 | 0.003**                              | 0.010           |                 |
|                          | Cu-Cu <sub>1</sub>            | 2.31 ± 0.1    | 2.965 ± 0.024 | 0.007**                              |                 |                 |
|                          | <u><i>PdCuO</i></u>           |               |               |                                      |                 |                 |
|                          | Cu-O <sub>1</sub>             | 1.26 ± 0.2    | 1.902 ± 0.010 | 0.003**                              |                 |                 |
|                          | Cu-Cu <sub>1</sub>            | 0.95*         | 3.000 ± 0.024 | 0.007**                              |                 |                 |
| Cu-Pd <sub>1</sub>       | 0.32*                         | 3.018 ± 0.056 | 0.012**       |                                      |                 |                 |
| Red. I <sub>r</sub>      | <i>Scattering Path</i>        | <i>CN</i>     | <i>R (Å)</i>  | <i>σ<sup>2</sup> (Å<sup>2</sup>)</i> |                 | <i>R-factor</i> |
|                          | <u><i>Cu<sub>2</sub>O</i></u> |               |               |                                      |                 |                 |
|                          | Cu-O <sub>1</sub>             | 2.29 ± 0.4    | 1.944 ± 0.018 | 0.013 ± 0.003                        | 0.008           |                 |
|                          | Cu-Cu <sub>1</sub>            | 6.88 ± 1.3    | 3.001 ± 0.020 | 0.027 ± 0.003                        |                 |                 |
|                          | <u><i>PdCu</i></u>            |               |               |                                      |                 |                 |
|                          | Cu-Cu <sub>1</sub>            | 2.26 ± 0.4    | 2.651 ± 0.020 | 0.027 ± 0.003                        |                 |                 |
| Cu-Pd <sub>1</sub>       | 2.26 ± 0.4                    | 2.657 ± 0.016 | 0.013 ± 0.002 |                                      |                 |                 |
| Red. A <sub>r</sub>      | <i>Scattering Path</i>        | <i>CN</i>     | <i>R (Å)</i>  | <i>σ<sup>2</sup> (Å<sup>2</sup>)</i> |                 | <i>R-factor</i> |
|                          | <u><i>Cu<sub>2</sub>O</i></u> |               |               |                                      |                 |                 |
|                          | Cu-O <sub>1</sub>             | 0.20*         | 1.845 ± 0.028 | 0.003 ± 0.004                        | 0.020           |                 |
|                          | Cu-Cu <sub>1</sub>            | 0.60*         | 3.013 ± 0.012 | 0.017 ± 0.001                        |                 |                 |
|                          | <u><i>PdCu</i></u>            |               |               |                                      |                 |                 |
|                          | Cu-Cu <sub>1</sub>            | 1.58*         | 2.586 ± 0.043 | 0.017 ± 0.011                        |                 |                 |
|                          | Cu-Pd <sub>1</sub>            | 2.58*         | 2.585 ± 0.056 | 0.015 ± 0.003                        |                 |                 |
| <u><i>Cu</i></u>         |                               |               |               |                                      |                 |                 |
| Cu-Cu <sub>1</sub>       | 2.58*                         | 2.487 ± 0.043 | 0.017 ± 0.011 |                                      |                 |                 |
| Oxi. D <sub>o</sub>      | <i>Scattering Path</i>        | <i>CN</i>     | <i>R (Å)</i>  | <i>σ<sup>2</sup> (Å<sup>2</sup>)</i> | <i>R-factor</i> |                 |
|                          | <u><i>Cu<sub>2</sub>O</i></u> |               |               |                                      |                 |                 |
|                          | Cu-O <sub>1</sub>             | 0.49*         | 1.877 ± 0.022 | 0.004 ± 0.003                        | 0.018           |                 |
|                          | <u><i>PdCu</i></u>            |               |               |                                      |                 |                 |
| Cu-Cu <sub>1</sub>       | 3.43*                         | 2.538 ± 0.013 | 0.009 ± 0.001 |                                      |                 |                 |
| Cu-Pd <sub>1</sub>       | 3.43*                         | 2.595 ± 0.019 | 0.013 ± 0.001 |                                      |                 |                 |
| Oxi. I <sub>o</sub>      | <i>Scattering Path</i>        | <i>CN</i>     | <i>R (Å)</i>  | <i>σ<sup>2</sup> (Å<sup>2</sup>)</i> | <i>R-factor</i> |                 |
|                          | <u><i>Cu<sub>2</sub>O</i></u> |               |               |                                      |                 |                 |
|                          | Cu-O <sub>1</sub>             | 1.97*         | 1.906 ± 0.015 | 0.009 ± 0.003                        | 0.012           |                 |
|                          | Cu-Cu <sub>1</sub>            | 5.90*         | 3.044 ± 0.033 | 0.029 ± 0.004                        |                 |                 |
| <u><i>PdCu</i></u>       |                               |               |               |                                      |                 |                 |
| Cu-Cu <sub>1</sub>       | 2.94*                         | 2.694 ± 0.033 | 0.029 ± 0.004 |                                      |                 |                 |

|                     |                        |            |               |                                      |                 |
|---------------------|------------------------|------------|---------------|--------------------------------------|-----------------|
|                     | Cu-Pd <sub>1</sub>     | 2.94*      | 2.670 ± 0.016 | 0.012 ± 0.002                        |                 |
|                     | <b>Scattering Path</b> | <b>CN</b>  | <b>R (Å)</b>  | <b>σ<sup>2</sup> (Å<sup>2</sup>)</b> | <b>R-factor</b> |
| Oxi. A <sub>o</sub> | <u>CuO</u>             |            |               |                                      | 0.010           |
|                     | Cu-O <sub>1</sub>      | 1.02 ± 0.1 | 1.977 ± 0.005 | 0.003 ± 0.001                        |                 |
|                     | Cu-Cu <sub>1</sub>     | 2.05*      | 2.975 ± 0.018 | 0.040 ± 0.010                        |                 |
|                     | <u>PdCuO</u>           |            |               |                                      |                 |
|                     | Cu-O <sub>1</sub>      | 1.25 ± 0.2 | 1.894 ± 0.005 | 0.003 ± 0.001                        |                 |
|                     | Cu-Cu <sub>1</sub>     | 0.94*      | 3.010 ± 0.018 | 0.040 ± 0.010                        |                 |
|                     | Cu-Pd <sub>1</sub>     | 0.31*      | 2.997 ± 0.020 | 0.017 ± 0.020                        |                 |
|                     | <b>Scattering Path</b> | <b>CN</b>  | <b>R (Å)</b>  | <b>σ<sup>2</sup> (Å<sup>2</sup>)</b> | <b>R-factor</b> |
| RT He               | <u>CuO</u>             |            |               |                                      | 0.010           |
|                     | Cu-O <sub>1</sub>      | 1.15 ± 0.1 | 2.008 ± 0.025 | 0.010**                              |                 |
|                     | Cu-Cu <sub>1</sub>     | 2.30 ± 0.1 | 2.978 ± 0.023 | 0.065**                              |                 |
|                     | <u>PdCuO</u>           |            |               |                                      |                 |
|                     | Cu-O <sub>1</sub>      | 1.28 ± 0.1 | 1.905 ± 0.025 | 0.010**                              |                 |
|                     | Cu-Cu <sub>1</sub>     | 0.96 ± 0.1 | 3.012 ± 0.023 | 0.065**                              |                 |
|                     | Cu-Pd <sub>1</sub>     | 0.32 ± 0.1 | 3.016 ± 0.032 | 0.010**                              |                 |

\*Parameters were fixed in the fitting and obtained as the product of N of the shell from the model and adjusted S<sub>o</sub><sup>2</sup> for the reference Cu.

\*\* Parameters fixed for the fitting.

Table S3: Structural parameters obtained from the fitting of EXAFS at the Pt L<sub>III</sub>-edge for the alumina supported Pt-Cu NCs (k range for the Fourier transform 2.5-12.4 Å<sup>-1</sup>, the R-range for the fitting was 1-3.5/4 Å).

|                          | Scattering Path | CN         | R (Å)         | σ <sup>2</sup> (Å <sup>2</sup> ) | R-factor |  |
|--------------------------|-----------------|------------|---------------|----------------------------------|----------|--|
| As-synthesized Pt-Cu NCs | <u>PtCu</u>     |            |               |                                  |          |  |
|                          | Pt-Pt1          | 6.31 ± 0.8 | 2.706 ± 0.004 | 0.006 ± 0.0004                   | 0.027    |  |
|                          | Pt-Cu1          | 2.77 ± 0.7 | 2.689 ± 0.010 | 0.009 ± 0.002                    |          |  |
|                          | Pt-Pt2          | 3.16 ± 0.3 | 3.813 ± 0.004 | 0.006 ± 0.0004                   |          |  |
|                          | Pt-Cu2          | 1.39 ± 0.4 | 3.796 ± 0.010 | 0.009 ± 0.002                    |          |  |
| Red. D <sub>r</sub>      | <u>PtO</u>      |            |               |                                  |          |  |
|                          | Pt-O1           | 1.79 ± 0.2 | 2.008 ± 0.010 | 0.003 ± 0.001                    | 0.029    |  |
|                          | Pt-Pt1          | 1.79 ± 0.2 | 3.070 ± 0.015 | 0.005 ± 0.001                    |          |  |
|                          | <u>Pt</u>       |            |               |                                  |          |  |
|                          | Pt-Pt1          | 4.24 ± 0.6 | 2.762 ± 0.015 | 0.005 ± 0.001                    |          |  |
| Red. A <sub>r</sub>      | <u>PtCu</u>     |            |               |                                  |          |  |
|                          | Pt-Pt1          | 8.00 ± 0.6 | 2.747 ± 0.005 | 0.008 ± 0.0004                   | 0.023    |  |
|                          | Pt-Cu1          | 1.52 ± 0.6 | 2.665 ± 0.013 | 0.010 ± 0.003                    |          |  |
|                          | Pt-Pt2          | 4.00 ± 0.3 | 3.852 ± 0.005 | 0.008 ± 0.0004                   |          |  |
|                          | Pt-Cu2          | 0.76 ± 0.3 | 3.771 ± 0.013 | 0.010 ± 0.003                    |          |  |
| Oxi. D <sub>o</sub>      | <u>PtCu</u>     |            |               |                                  |          |  |
|                          | Pt-Pt1          | 6.96 ± 0.8 | 2.721 ± 0.004 | 0.006 ± 0.0004                   | 0.017    |  |
|                          | Pt-Cu1          | 2.83 ± 0.7 | 2.680 ± 0.011 | 0.008 ± 0.002                    |          |  |
|                          | Pt-Pt2          | 3.48 ± 0.4 | 3.827 ± 0.004 | 0.006 ± 0.0004                   |          |  |
|                          | Pt-Cu2          | 1.42 ± 0.4 | 3.787 ± 0.011 | 0.008 ± 0.002                    |          |  |
| Oxi. A <sub>o</sub>      | <u>Pt</u>       |            |               |                                  |          |  |
|                          | Pt-Pt1          | 8.90 ± 0.7 | 2.734 ± 0.006 | 0.012 ± 0.001                    | 0.027    |  |
|                          | <u>PtO</u>      |            |               |                                  |          |  |
|                          | Pt-O1           | 0.36 ± 0.1 | 2.068 ± 0.035 | 0.013 ± 0.002                    |          |  |
|                          | Pt-Pt2          | 0.36 ± 0.1 | 3.225 ± 0.006 | 0.012 ± 0.001                    |          |  |
| RT He                    | <u>Pt</u>       |            |               |                                  |          |  |
|                          | Pt-Pt1          | 3.44 ± 0.4 | 2.764 ± 0.004 | 0.005 ± 0.0004                   | 0.021    |  |
|                          | <u>PtO</u>      |            |               |                                  |          |  |
|                          | Pt-O2           | 2.17*      | 2.010 ± 0.008 | 0.004 ± 0.001                    |          |  |
|                          | Pt-Pt1          | 0.81*      | 3.082 ± 0.019 | 0.005 ± 0.0004                   |          |  |
|                          | Pt-Pt2          | 1.63*      | 3.470 ± 0.019 | 0.005 ± 0.0004                   |          |  |

\*Parameters were fixed in the fitting and obtained as the product of N of the shell from the model and adjusted S<sub>0</sub><sup>2</sup> for the reference Pt.



Table S4: Structural parameters obtained from the fitting of EXAFS at the Cu K-edge for the alumina supported Pt-Cu NCs (k range for the Fourier transform 2.5-12.4 Å<sup>-1</sup>, the R-range for the fitting was 1-3.5/4 Å).

|                          | Scattering Path        | CN            | R (Å)         | $\sigma^2(\text{Å}^2)$ | R-factor |  |
|--------------------------|------------------------|---------------|---------------|------------------------|----------|--|
| As-synthesized Pt-Cu NCs | <u>CuO</u>             |               |               |                        |          |  |
|                          | Cu-O1                  | 2.42 ± 0.4    | 1.993 ± 0.01  | 0.010 ± 0.002          | 0.022    |  |
|                          | Cu-Cu1                 | 4.85 ± 0.7    | 2.880 ± 0.01  | 0.018 ± 0.002          |          |  |
|                          | <u>PtCu</u>            |               |               |                        |          |  |
|                          | Cu-Cu1                 | 1.64*         | 2.670 ± 0.01  | 0.018 ± 0.002          |          |  |
| Cu-Pt1                   | 1.64*                  | 2.670 ± 0.01  | 0.010 ± 0.005 |                        |          |  |
| Red. D <sub>r</sub>      | <u>CuO</u>             |               |               |                        |          |  |
|                          | Cu-O1                  | 2.77 ± 0.4    | 1.952 ± 0.012 | 0.003 ± 0.002          | 0.021    |  |
|                          | Cu-Cu1                 | 5.54 ± 0.7    | 2.936 ± 0.023 | 0.020 ± 0.003          |          |  |
| Red. I <sub>r</sub>      | <u>Cu<sub>2</sub>O</u> |               |               |                        |          |  |
|                          | Cu-O1                  | 0.69 ± 0.2    | 1.901 ± 0.03  | 0.009 ± 0.013          | 0.006    |  |
|                          | Cu-Cu1                 | 2.07 ± 0.7    | 2.950 ± 0.03  | 0.014 ± 0.004          |          |  |
|                          | <u>PtCu</u>            |               |               |                        |          |  |
|                          | Cu-Cu1                 | 4.58 ± 0.5    | 2.607 ± 0.03  | 0.014 ± 0.004          |          |  |
| Cu-Pt1                   | 4.00 ± 0.6             | 2.574 ± 0.10  | 0.013 ± 0.100 |                        |          |  |
| Red. A <sub>r</sub>      | <u>Cu<sub>2</sub>O</u> |               |               |                        |          |  |
|                          | Cu-O1                  | 0.33 ± 0.2    | 1.927 ± 0.05  | 0.014 ± 0.011          | 0.009    |  |
|                          | Cu-Cu1                 | 1.00 ± 0.5    | 2.955 ± 0.01  | 0.019 ± 0.002          |          |  |
|                          | <u>PtCu</u>            |               |               |                        |          |  |
|                          | Cu-Cu1                 | 3.28 ± 0.6    | 2.613 ± 0.01  | 0.019 ± 0.002          |          |  |
| Cu-Pt1                   | 5.34 ± 0.7             | 2.613 ± 0.01  | 0.019 ± 0.003 |                        |          |  |
| Oxi. D <sub>o</sub>      | <u>PtCu</u>            |               |               |                        |          |  |
|                          | Cu-Cu1                 | 3.83 ± 0.6    | 2.644 ± 0.011 | 0.011 ± 0.001          | 0.020    |  |
|                          | Cu-Pt1                 | 4.91 ± 1.0    | 2.644 ± 0.012 | 0.011 ± 0.002          |          |  |
|                          | <u>Cu<sub>2</sub>O</u> |               |               |                        |          |  |
|                          | Cu-O1                  | 0.24*         | 1.900 ± 0.070 | 0.004 ± 0.013          |          |  |
| Cu-Cu1                   | 0.73*                  | 3.013 ± 0.011 | 0.011 ± 0.001 |                        |          |  |
| Oxi. I <sub>o</sub>      | <u>PtCu</u>            |               |               |                        |          |  |
|                          | Cu-Cu1                 | 4.72 ± 1.7    | 2.641 ± 0.015 | 0.018 ± 0.005          | 0.014    |  |
|                          | Cu-Pt1                 | 4.10 ± 1.1    | 2.647 ± 0.019 | 0.012 ± 0.003          |          |  |
|                          | <u>Cu<sub>2</sub>O</u> |               |               |                        |          |  |
|                          | Cu-O1                  | 0.10 ± 0.2    | 1.831 ± 0.010 | 0.003 ± 0.002          |          |  |
| Cu-Cu1                   | 0.16 ± 0.5             | 2.986 ± 0.015 | 0.018 ± 0.005 |                        |          |  |

|                     | <i>Scattering Path</i> | <i>CN</i>  | <i>R (Å)</i>  | $\sigma^2(\text{Å}^2)$ | <i>R-factor</i> |
|---------------------|------------------------|------------|---------------|------------------------|-----------------|
| Oxi. A <sub>o</sub> | <u>CuO</u>             |            |               |                        | 0.008           |
|                     | Cu-O1                  | 1.19 ± 0.1 | 1.953 ± 0.04  | 0.009 ± 0.002          |                 |
|                     | Cu-Cu1                 | 2.39 ± 0.2 | 2.643 ± 0.002 | 0.017 ± 0.002          |                 |
|                     | Cu-O2                  | 1.59 ± 0.2 | 1.934 ± 0.04  | 0.009 ± 0.002          |                 |
|                     | <u>Cu<sub>2</sub>O</u> |            |               |                        |                 |
|                     | Cu-O1                  | 1.08 ± 0.4 | 1.993 ± 0.04  | 0.010 ± 0.002          |                 |
|                     | Cu-Cu1                 | 3.24 ± 0.1 | 2.900 ± 0.002 | 0.018 ± 0.002          |                 |
|                     | <i>Scattering Path</i> | <i>CN</i>  | <i>R (Å)</i>  | $\sigma^2(\text{Å}^2)$ | <i>R-factor</i> |
| RT He               | <u>CuO</u>             |            |               |                        | 0.011           |
|                     | Cu-O1                  | 2.90 ± 0.2 | 1.955 ± 0.008 | 0.004 ± 0.001          |                 |
|                     | Cu-Cu1                 | 5.71 ± 0.5 | 2.921 ± 0.02  | 0.020 ± 0.003          |                 |
|                     | Cu-O2                  | 3.81 ± 0.3 | 3.692 ± 0.02  | 0.004 ± 0.001          |                 |

\*Parameters were fixed in the fitting and obtained as the product of N of the shell from the model and adjusted  $S_0^2$  for the reference Cu.

## REFERENCES

- (1) Yin, M.; Wu, C.-K.; Lou, Y.; Burda, C.; Koberstein, J. T.; Zhu, Y.; O'Brien, S., Copper Oxide Nanocrystals. *J. Am. Chem. Soc.* **2005**, *127*, 9506-9511.
- (2) Christensen, G. L.; Langell, M. A., Characterization of Copper Palladium Oxide Solid Solutions by X-Ray Diffraction, X-Ray Photoelectron Spectroscopy, and Auger Electron Spectroscopy. *J. Phys. Chem. C* **2013**, *117*, 7039-7049.
- (3) Martini, A.; Alladio, E.; Borfecchia, E., Determining Cu-Speciation in the Cu-CHA Zeolite Catalyst: The Potential of Multivariate Curve Resolution Analysis of In Situ XAS Data. *Top. Catal.* **2018**, *61*, 1396-1407.
- (4) Staniuk, M.; Zindel, D.; Van Beek, W.; Hirsch, O.; Kränzlin, N.; Niederberger, M.; Koziej, D., Matching the Organic and Inorganic Counterparts During Nucleation and Growth of Copper-Based Nanoparticles - In Situ Spectroscopic Studies. *CrystEngComm* **2015**, *17*, 6962-6971.
